# Supplementary material
Source: PubMed Central journal article supplement (PMC3964096)
Supplement: 1322937111_sapp.pdf [file 1322937111_sapp.pdf]

## Supporting Information:

**General Methods and Materials for Chemical Synthesis.** Microwave irradiations were performed in Biotage Initiator. Other reactions were performed in capped glass vials.  $^1\text{H}$  NMR spectra were measured on a 300 & 500 MHz Varian spectrometer using TMS as internal standard. Mass spectra were measured on a Waters Acquity LC-MS instrument. Thin-layer chromatography (TLC) was performed on precoated silica gel GF plates purchased from Merck, Inc. Isco Combiflash systems were used for flash chromatography. All other chemicals were obtained from commercial sources and were used as received.

*Synthesis of compound 6* (Fig. S1A). Compound **5** (487 mg, 1.02 mmol) was charged in a 10 ml flask and trifluoroacetic acid (TFA, 1.3 mL) was added dropwise at 0 °C. The reaction mixture was warmed to room temperature and stirred for 30 min. The solvents were evaporated under reduced pressure and the TFA salts in DMF (3.5 mL) were added dropwise to pyridine (100 mL) at 0 °C. The reaction mixture was slowly warmed to room temperature and stirred for overnight. The solvents were evaporated under reduced pressure and the white solid was washed with EtOAc to give pure **6** in 69% yield. MS:  $m/z$  525 ( $\text{M}+\text{H}^+$ );  $^1\text{H}$  NMR (500 MHz, DMSO, ppm):  $\delta$  1.29-1.40 (m, 8H,  $\text{CH}_2\text{CH}_2$ ), 1.61-1.68 (m, 4H,  $\text{CH}_2$ ), 2.97 (dd,  $J = 6.0, 12.5$  Hz, 4H,  $\text{NCH}_2$ ), 3.79 (br, 2H, COCH), 7.22 (t,  $J = 5.5$  Hz, 2H, aromatic), 7.33-7.37 (m, 8H, aromatic), 8.10 (s, 2H, NH).

*Synthesis of compound 7* (Fig. S1A). A cloudy solution of compound **6** (95 mg, 0.18 mmol) in 50% acetic acid/ $\text{CH}_2\text{Cl}_2$  (6 mL) was added to Pd on charcoal (10 wt %, 36.5 mg). The black suspension was degassed for 5 mins and hydrogen gas was introduced. The reaction mixture was stirred at rt overnight and was then filtered through a layer of Celite, which was washed several times with MeOH. The combined filtrates were concentrated to obtain yellow viscous oil, which was solidified by adding EtOAc. The solid was washed by ethyl acetate to yield compound **7** in 90% yield. MS:  $m/z$  257 ( $\text{M}+\text{H}^+$ );  $^1\text{H}$  NMR (500 MHz,  $\text{D}_2\text{O}$ , ppm):  $\delta$  1.39-1.52 (m, 4H,  $\text{CH}_2$ ), 1.67-1.71 (m, 4H,  $\text{CH}_2$ ), 1.84-1.88 (m, 4H,  $\text{CH}_2$ ), 2.99 (t,  $J = 7.5$  Hz, 4H,  $\text{NCH}_2$ ), 4.14 (t,  $J = 5.0$  Hz, 2H, COCH).

*Synthesis of cKK-E12* (Fig. S1A). To a mixture of compound **7** (169.2 mg, 0.45 mmol) and 1,2-epoxydodecane (523 mg, 2.7 mmol) in EtOH was added triethylamine (182 mg, 1.8 mmol), which was stirred 30 mins at rt. The reaction mixture was then irradiated in the microwave reactor at 150 °C for 5 h. The mixture was purified by flash column chromatography to obtain compound **cKK-E12** in 52% yield as light yellow oil. MS:  $m/z$  993 ( $\text{M}+\text{H}^+$ );  $^1\text{H}$  NMR (500 MHz, DMSO, ppm):  $\delta$  0.87 (t,  $J = 7.0$  Hz, 12H,  $\text{CH}_3$ ), 1.21-1.39 (m, 80H,  $\text{CH}_2$ ), 1.64-1.67 (m, 4H,  $\text{CH}_2$ ), 2.25-2.44 (m, 12H,  $\text{NCH}_2$ ), 3.44 (br, 4H, CHOH), 3.79 (br, 2H, COCH), 4.21 (d,  $J = 3.0$  Hz, 2H, CHOH), 4.27 (d,  $J = 3.0$  Hz, 2H, CHOH), 8.11 (br, 2H, CONH).

**Nucleic acids.** siRNAs were produced by Alnylam, which were characterized by electrospray mass spectrometry and anion exchange HPLC. The sequences for the sense and antisense strands are as follows (*in vitro*  $\text{IC}_{50}$ : FVII: ~ 10 pM; CD45: ~90 pM; Tie2: ~25 pM; PTEN: < 1 pM):

siLuc sense: 5'-AAcGcuGGGcGuuAAucAAdTdT-3', antisense: 5'-

UUGAUuAACGCCcAGCGUUDtSdT-3';

siFVII sense: 5'-GGAUfCfAUfCfUfCfAAGUfCfUfUfACfdTsdT-3', antisense: 5'-

GUfAAGACfUfUfGAGAUfGAUfCfCfdTsdT-3';

siGFP-Alexa647 sense: 5'-AcAuGAAGcAGcACGACuUdTsdT-3', antisense: 5'-

AAGUCGUGCUGCUUCAUGUdTdT-3'-Alexa647;

siCD45 sense: 5'-TTCCTCCATGCTTGGCCAGTATTC-3', antisense: 5'-TCCCAGATCATCCTCCAGAAGTCA-3'

siPten sense: 5'-GAuGAuGuuuGAAAcuAuudTsdT-3', antisense: 5'-AAuAGUuUcAAAcAUcAUCdTsdT-3'

siTie2 sense: 5'-GAAGAuGcAGuGAuuuAcAdTsdT-3', antisense: 5'-UGuAAAuAcUGcAUCUUCdTsdT-3'

siTTR sense: 5'-GuAAccAAGAGuAuuccAudTdT-3', antisense: 5'-AUGGAAuACUCUUGGUuACdTdT-3';

2'-OMe modified nucleotides are in lower case. 2'-fluoro modified nucleotides are denoted by "f," and phosphorothioate linkages are represented by "s." siRNAs were generated by annealing equimolar amounts of complementary sense and antisense strands.

**Assembling of LPNs.** Lipoamino acid, lipopeptide, or lipopolypeptide derivatives were formulated with cholesterol, DSPC (1,2-distearoyl-*sn*-glycero-3-phosphocholine), mPEG2000-DMG [polyethylene glycol modified lipid (R)-3-[( $\omega$ -methoxy-PEG2000-carbamoyl)]-1,2-di-O-tetradecyl-*sn*-glyceride, synthesized by Alnylam], and siRNA via a microfluidic based mixing device. Formulations were then dialyzed against PBS in 3,500 MWCO dialysis cassettes overnight. Particles were characterized with a modified Ribogreen assay for siRNA entrapment and dynamic light scattering (ZetaPALS, Brookhaven Instruments) for mean particle diameter. cKK-E12 LPNs were made from cholesterol, DSPC, and mPEG2000-DMG using a similar method at a molar ratio of 50:10:38.5:1.5. This formulation afforded a mean particle diameter of ~70 nm with approximately 65% siRNA entrapment efficiency.

**In Vivo Factor VII Silencing in Mice & Rats.** All procedures used in animal studies conducted at MIT and Alnylam were approved by the Institutional Animal Care and Use Committee (IACUC) and were also consistent with local, state and federal regulations as applicable. C57BL/6 mice (Charles River Labs, 6 to 8 weeks old, 18-22 grams, and 10 ul/g), Sprague-Dawley rats (Charles River Labs, 8 weeks old, 170-200 grams, and 5 ul/g), *apoE*<sup>-/-</sup> mice (Jackson Laboratories, C57BL/6 background, 6 to 8 weeks old, 18-22 grams, and 10 ul/g), and *LDLR*<sup>-/-</sup> mice (Jackson Laboratories, C57BL/6 background, 6 to 8 weeks old, 18-22 grams, and 10 ul/g) were administered intravenously via tail vein injection for siRNA silencing experiments. After 24 or 48 h, animals were anaesthetized by isofluorane inhalation for blood sample collection by retroorbital eye bleed using serum separation tubes (Falcon tubes, Becton Dickinson). Protein levels of Factor VII were calculated by chromogenic assay (Biophen FVII, Aniara Corporation) with a standard curve obtained from control mice.

**Gene Silencing in Endothelial Cells in Mice.** Endothelial and hepatocyte silencing were examined 48 h after injection. Mice were sacrificed by CO<sub>2</sub> asphyxiation, and lung, liver, heart, and kidney tissues were harvested and immediately frozen in liquid nitrogen. Frozen tissues were pulverized, and tissue lysates were prepared in Tissue and Cell Lysis Buffer (Epicentre) supplemented with 0.5 mg/ml Proteinase K (Epicentre). Factor VII silencing was evaluated in liver lysates, while Tie2 silencing was evaluated in lysates from all 4 tissues collected using a branched DNA assay (QuantiGene 2.0 Reagent System, Affymetrix). A standard curve for each tissue and target gene was constructed using samples from PBS-treated mice, and the relative

silencing in treated groups was determined by measuring each individual target gene/GAPDH level and normalizing to the corresponding ratio for PBS-treated mice controls.

**Gene Silencing in Immune Cells in Mice.** Mice were injected with 1 mg/kg of cKK-E12 LNP-siRNA, with siRNA specific for CD45 or Luciferase. Three days after injection, leukocytes were isolated from bone marrow, peritoneal cavity, and spleen to analyze surface CD45 expression in cells from animals injected with CD45 versus control Luc siRNA. Flow cytometric analysis was performed following standard previously described procedures. Antibodies specific for mouse CD19, CD11b, GR-1, TCRb (eBioscience, San Diego, CA) were used. Antibodies were conjugated to fluorescein isothiocyanate, phycoerythrin, allophycocyanin (APC), phycoerythrin-Cy7, or biotin. Biotinylated antibodies were detected with streptavidin conjugated to fluorescein isothiocyanate, phycoerythrin, or APC. Stained cells were analyzed using BD LSRII (BD Biosciences– Pharmingen). Flow cytometric data analysis was done using FlowJo software (Tree Star, Ashland, OR).

**Cellular Internalization Assays.** HeLa cells were seeded at  $1.5 \times 10^4$  cells per well in black 96-well plates (Greiner Bio-one). Cells were incubated with 50ng cKK-E12 BLNPs in the presence of ApoE (1µg/well) for 3 hrs. Incubation time of labeled markers for different endocytic pathways is based on their internalization rate. For example, Oregon Green Dextran (300 µg/ml marker for macropinocytosis) was co-incubated for 3 hrs, while Alexa 488-Transferrin (1µg/ml, marker for clathrin mediated endocytosis) and Alexa 488-Cholera Toxin B (10 µg/ml, marker for caveolae mediated endocytosis) were co-incubated for 15 and 30 mins, respectively, with the BLNPs. Cells were washed, fixed, and counterstained in OPTI-MEM containing Hoescht (2 µg/ml) for nuclei identification. Triple-stained live cell imaging was performed with an automated spinning disk confocal microscope (OPERA, Perkin Elmer) with a 40X objective. The same defined pattern of 20 fields from each well was acquired to eliminate bias and provide a statistically significant number of cells for analysis.

**In Vitro siRNA Transfection Assay and Microscopy.** Effects of apolipoproteins were evaluated through an *in vitro* siRNA transfection assay in HeLa cells as previously reported. HeLa cells, stably expressing firefly luciferase and Renilla luciferase were seeded in an opaque white 96-well plate (Corning-Costar) overnight. Cells were transfected by cKK-E12 formulated 50 ng of firefly-specific siLuc in quadruplicate. Apolipoproteins (Fitzgerald Industries) were incubated with cKK-E12 formulations for 5 mins before adding to cells. After 24 h incubation at 37 °C, 5% CO<sub>2</sub>, cells were analyzed for luciferase expression using Dual-Glo assay kits (Promega). For visualization of cell uptake, cKK-E12 was formulated with an Alexa-Fluor 647–labeled siRNA and incubated with HeLa cells for 3 h. Cells were then fixed in 4% paraformaldehyde, permeabilized with 0.1% saponin and stained with Hoescht. All images were acquired using an Opera spinning disc confocal system (Perkin Elmer), and the data was analyzed using Acapella Software (Perkin Elmer).

**In Vivo Delivery of siRNA in Rats and its Tolerability.** To evaluate whether the silencing activity in mice could be translated to other animal species, we further studied the delivery efficiency of cKK-E12 in rats. As shown in figure S5, cKK-E12 LPNs showed significant dose-dependent silencing with an ED<sub>50</sub> lower than 0.01 mg/kg. To examine the potential for toxicity with cKK-E12, we performed a single-dose tolerability study in rats (0.3 and 1 mg/kg). There was no significant alteration of clinical signs and body weight in treated groups compared with

control group. cKK-E12 LPNs was well tolerated with no clinically significant changes in key serum chemistry parameters at doses up to 1 mg/kg (Table S2).

**Silencing Effect of cKK-E12 LPNs in Nonhuman Primates.** All procedures using Cynomolgus monkeys (3.4 to 3.8 years old, 2.4 to 3.0 kg, and 5 mL/kg) were conducted by a certified contract research organization using protocols consistent with local, state and federal regulations as applicable and approved by the Institutional Animal Care and Use Committee (IACUC). cKK-E12 was formulated with siRNA specific to transthyretin (TTR) through 15-min intravenous infusions (5 mL/kg) via the cephalic vein in cynomolgus monkeys (three per group) at a dose of 0.3 mg/kg. TTR mRNA levels were calculated relative to GAPDH mRNA levels using a branched DNA assay (QuantiGene Assay, Affymetrix, CA).

**Table S1.** A summary of the calculated and observed m/z ratios in the LC-MS spectra of amino acid-based lipid derivatives, siRNA entrapment, and a representative structure of K-E12.

| Compd    | Chemical formula | Calcd.   | Observed | Tail # | Entrapment (%)  |
|----------|------------------|----------|----------|--------|-----------------|
| A-E12    | C27H54NO3+       | 440.4098 | 440.4336 | 2      | 53              |
| C-E12    | C27H54NO3S+      | 472.3819 | 472.4303 | 2      | 0               |
| D-E12    | C28H54NO5+       | 484.3997 | 484.4327 | 2      | 0               |
| E-E12    | C29H56NO5+       | 498.4153 | 498.4117 | 2      | 0               |
| F-E12    | C33H58NO3+       | 516.4411 | 516.4332 | 2      | 0               |
| G-E12    | C26H52NO3+       | 426.3942 | 426.3772 | 2      | 0               |
| H-E12    | C42H80N3O4+      | 690.6143 | 690.6016 | 3      | 0               |
| I-E12    | C30H60NO3+       | 482.4568 | 482.4461 | 2      | 6               |
| K-E12    | C42H85N2O4+      | 681.6504 | 681.6009 | 3      | 56              |
| L-E12    | C30H60NO3+       | 482.4568 | 482.4771 | 2      | 0               |
| M-E12    | C29H58NO3S+      | 500.4132 | 500.4471 | 2      | 0               |
| N-E12    | C40H79N2O5+      | 667.5984 | 667.5894 | 3      | 0               |
| P-E12    | C17H32NO2+       | 282.2428 | 282.2585 | 1      | 0               |
| Q-E12    | C29H57N2O4+      | 497.4313 | 497.4268 | 2      | 0               |
| R-E12    | C54H109N4O5+     | 893.8392 | 893.8400 | 4      | 50              |
| S-E12    | C27H54NO4+       | 456.4047 | 456.3891 | 2      | 0               |
| T-E12    | C28H56NO4+       | 470.4204 | 470.4186 | 2      | 0               |
| V-E12    | C29H58NO3+       | 468.4411 | 468.4259 | 2      | 0               |
| W-E12    | C35H59N2O3+      | 555.4520 | 555.4510 | 2      | 10              |
| Y-E12    | C33H58NO4+       | 532.436  | 532.4149 | 2      | 10              |
| cKG-E12  | C32H64N3O4+      | 554.4891 | 554.4852 | 2      | 50 <sup>P</sup> |
| cKT-E12  | C34H68N3O5+      | 598.5153 | 598.5179 | 2      | 31              |
| cYK-E12  | C39H70N3O5+      | 660.5310 | 660.5350 | 2      | 15              |
| cLK-E12  | C36H72N3O4+      | 610.5517 | 610.5556 | 2      | 64 <sup>P</sup> |
| cDK-E12* | C36H70N3O6+      | 640.5259 | 640.5316 | 2      | 63              |
| cMK-E12  | C35H70N3O4S+     | 628.5082 | 628.5072 | 2      | 73              |

|         |               |           |           |   |                 |
|---------|---------------|-----------|-----------|---|-----------------|
| cKV-E12 | C35H70N3O4+   | 596.5361  | 596.5330  | 2 | 53 <sup>P</sup> |
| cAK-E12 | C33H66N3O4+   | 568.5048  | 568.4992  | 2 | 72              |
| cCK-E12 | 33H66N3O4S+   | 600.4769  | 600.6143  | 2 | ND              |
| cQK-E12 | C35H69N4O5+   | 625.5262  | 625.4733  | 2 | 44              |
| cPK-E12 | C35H68N3O4+   | 594.5204  | 594.5169  | 2 | 64              |
| cFK-E12 | C39H70N3O4+   | 644.5361  | 644.5301  | 2 | 48 <sup>P</sup> |
| cWK-E12 | C41H71N4O4+   | 683.5470  | 683.5367  | 2 | 49              |
| cEK-E12 | C35H68N3O6+   | 626.5103  | 626.5053  | 2 | 4 <sup>P</sup>  |
| cIK-E12 | C36H72N3O4+   | 610.5517  | 610.5501  | 2 | 49              |
| cSK-E12 | C33H66N3O5+   | 584.4997  | 584.5029  | 2 | 18              |
| cKK-E10 | C52H105N4O6+  | 881.8029  | 881.8042  | 4 | 31              |
| cKK-E12 | C60H121N4O6+  | 993.9281  | 993.9224  | 4 | 65              |
| cKK-E14 | C68H137N4O6+  | 1106.0533 | 1106.0709 | 4 | 50              |
| cKK-E16 | C76H153N4O6+  | 1218.1785 | 1218.2002 | 4 | 52              |
| A-A12   | C27H56NO2+    | 426.4306  | 426.4244  | 2 | 0               |
| C-A12   | C27H56NO2S+   | 458.4026  | 458.3857  | 2 | ND              |
| D-A12   | C28H56NO4+    | 470.4204  | 470.4188  | 2 | ND              |
| E-A12   | C29H58NO4+    | 484.4360  | 484.4319  | 2 | 0               |
| F-A12   | C33H60NO2+    | 502.4619  | 502.4560  | 2 | 0               |
| G-A12   | C26H54NO2+    | 412.4149  | 412.4107  | 2 | 0               |
| H-A12   | C30H58N3O2+   | 492.4524  | 492.4503  | 2 | 71              |
| I-A12   | C30H62NO2+    | 468.4775  | 468.4714  | 2 | 0               |
| K-A12   | C54H111N2O2+  | 819.8640  | 819.8657  | 4 | 15              |
| L-A12   | C30H62NO2+    | 468.4775  | 468.4752  | 2 | 0               |
| M-A12   | C29H60NO2S+   | 486.4339  | 486.4318  | 2 | 0               |
| N-A12   | C28H57N2O3+   | 469.4364  | 469.4328  | 2 | 0               |
| P-A12   | C17H34NO2+    | 284.2584  | 284.2512  | 1 | 0               |
| Q-A12   | C29H59N2O3+   | 483.4520  | 483.4543  | 2 | 0               |
| R-A12   | C42H87N4O2+   | 679.6824  | 679.6783  | 3 | 62              |
| S-A12   | C27H56NO3+    | 442.4255  | 442.4225  | 2 | 0               |
| T-A12   | C28H58NO3+    | 456.4411  | 456.4398  | 2 | 0               |
| V-A12   | C29H60NO2+    | 454.4619  | 454.4544  | 2 | 0               |
| W-A12   | C35H61N2O2+   | 541.4728  | 541.4724  | 2 | 0               |
| Y-A12   | C33H60NO3+    | 518.4568  | 518.4543  | 2 | ND              |
| KK-A12  | C84H171N4O3+  | 1284.3346 | 1284.3458 | 6 | 51              |
| KKK-A12 | C114H231N6O4+ | 1748.8051 | 1748.8340 | 8 | ND              |
| cKK-A12 | C60H121N4O2+  | 929.9484  | 929.9445  | 4 | 69              |
| A-O12   | C18H36NO4+    | 330.2639  | 330.2582  | 1 | ND              |
| C-O12   | C33H64NO6S+   | 602.4449  | 602.4426  | 2 | ND              |

|         |                |           |           |   |    |
|---------|----------------|-----------|-----------|---|----|
| D-O12   | C19H36NO6+     | 374.2537  | 374.2492  | 1 | ND |
| E-O12   | C20H38NO6+     | 388.2694  | 388.2672  | 1 | ND |
| F-O12   | C24H40NO4+     | 406.2952  | 406.2896  | 1 | ND |
| G-O12   | C17H34NO4+     | 556.4572  | 556.4551  | 2 | 12 |
| H-O12   | C36H66N3O6+    | 636.4946  | 636.4969  | 2 | 54 |
| I-O12   | C21H42NO4+     | 372.3108  | 372.3054  | 1 | ND |
| K-O12   | C66H127N2O10+  | 1107.9485 | 1107.9417 | 4 | 61 |
| L-O12   | C21H42NO4+     | 372.3108  | 372.3052  | 1 | ND |
| M-O12   | C20H40NO4S+    | 390.2673  | 390.2628  | 1 | ND |
| N-O12   | C19H37N2O5+    | 373.2697  | 373.2668  | 1 | ND |
| P-O12   | C20H38NO4+     | 356.2795  | 356.2779  | 1 | ND |
| Q-O12   | C20H39N2O5+    | 387.2853  | 387.2831  | 1 | ND |
| R-O12   | C21H43N4O4+    | 415.3279  | 415.3235  | 1 | ND |
| S-O12   | C18H36NO5+     | 346.2588  | 346.2521  | 1 | ND |
| T-O12   | C19H38NO5+     | 360.2744  | 360.2733  | 1 | ND |
| V-O12   | C20H40NO4+     | 358.2952  | 358.2905  | 1 | ND |
| W-O12   | C26H41N2O4+    | 445.3061  | 445.3010  | 1 | ND |
| Y-O12   | C24H40NO5+     | 422.2901  | 422.2868  | 1 | ND |
| KK-O12  | C87H167N4O13+  | 1476.2524 | 1476.2533 | 5 | ND |
| KKK-O12 | C123H235N6O18+ | 2084.7652 | 2084.7650 | 7 | ND |
| cKK-O12 | C72H137N4O10+  | 1218.0329 | 1218.0880 | 4 | 75 |

\*: formation of ethyl ester. ND: compounds were not dissolved in the formulation solution. <sup>P</sup>: formulations were precipitated after dialysis. Compounds derived from poly-L-lysine are not included. Our screening criteria were as follows: 1. Compounds were not formulated if they were unable to be dissolved in formulation solution (10% citrate buffer in ethanol). 2. Materials were considered to be unstable, if solid precipitated from the formulation solution after dialysis. These materials were not evaluated in our bioassays. siRNA entrapment was evaluated using a Ribogreen assay reported previously <sup>1</sup>.

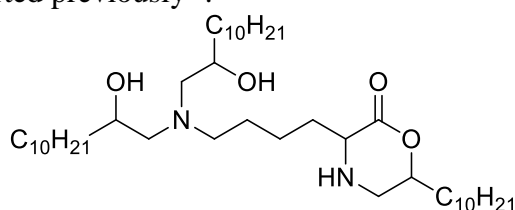

Structure of K-E12:

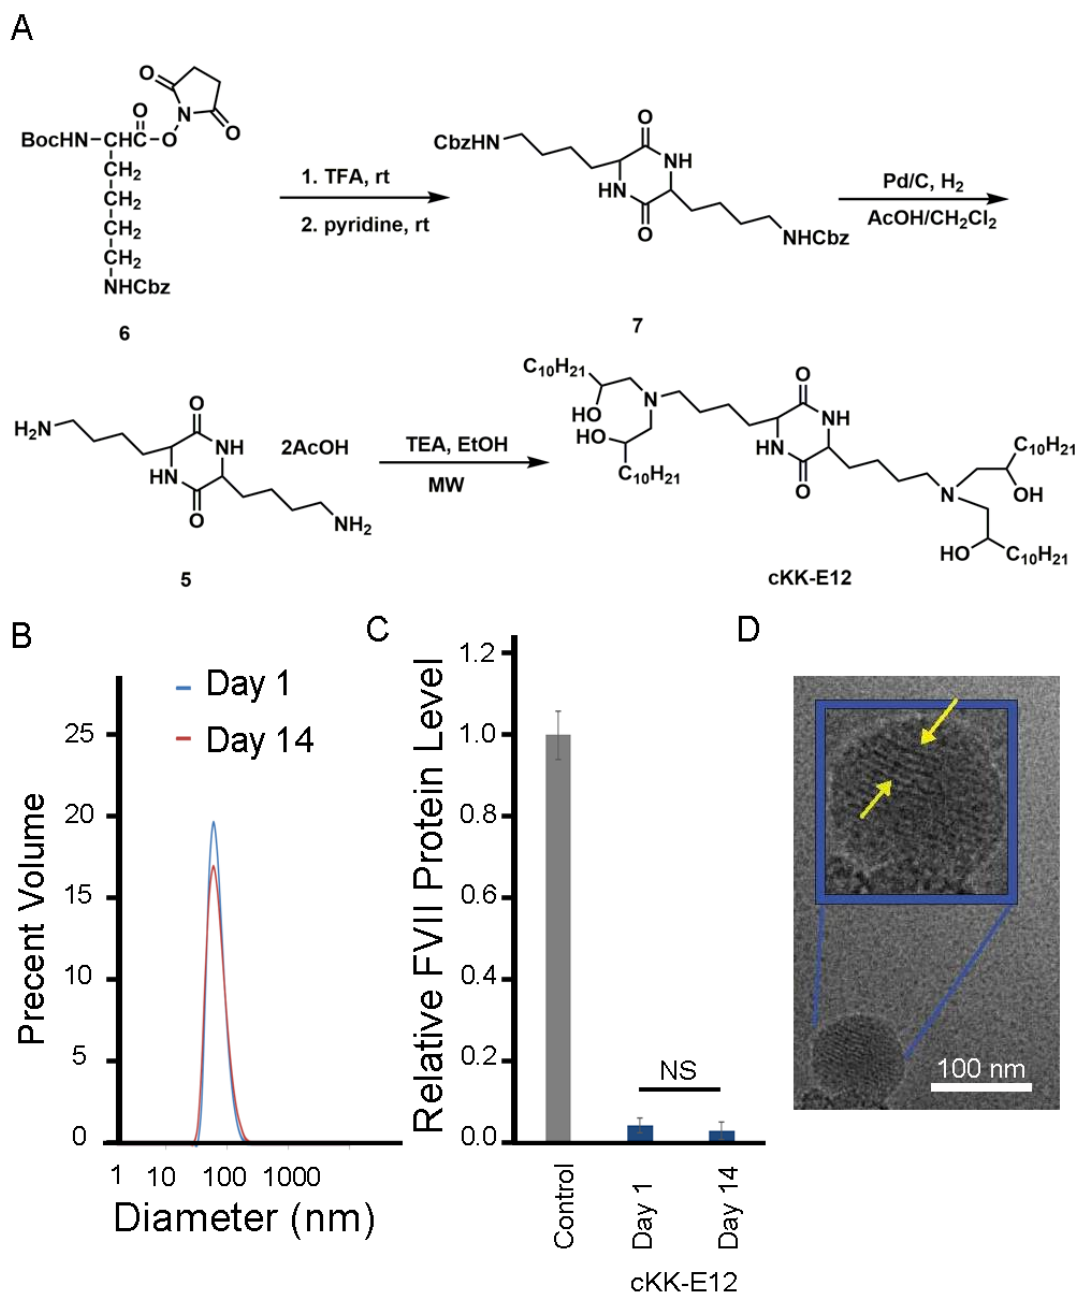

**Fig. S1. Synthesis and characterization of cKK-E12 LPNs.** (A) An alternative synthetic route to cKK-E12. (B) Particle size of cKK-E12 LPNs measured by dynamic light scattering (DLS) at day 1 (69.3 nm, PDI= 0.138) and 14 (70.8 nm, PDI= 0.098). (C) FVII silencing of cKK-E12 LPNs at day 1 and 14. (D) a cryo-TEM image of cKK-E12 LPNs with a textured interior.

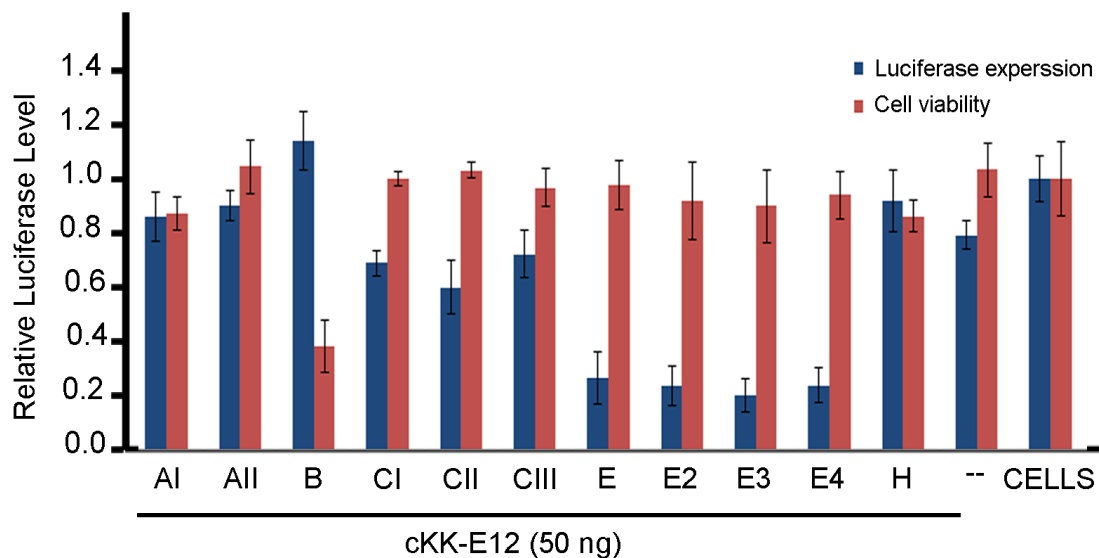

**Fig. S2. Silencing effects of apolipoproteins on cKK-E12 in HeLa cells.** apolipoproteins including ApoA-I (recombinant Human ApoA-I protein), ApoA-II (native Human ApoA-II protein), ApoB (native Human ApoB protein), ApoC-I (native Human ApoC-I protein), ApoC-II (native Human ApoC-II protein), ApoC-III (native Human ApoC-III protein), ApoE (native Human ApoE protein), ApoE2 (recombinant Human ApoE2 protein), ApoE3 (recombinant Human ApoE3 protein), ApoE4 (recombinant Human ApoE4 protein), ApoH (native Human ApoH protein).

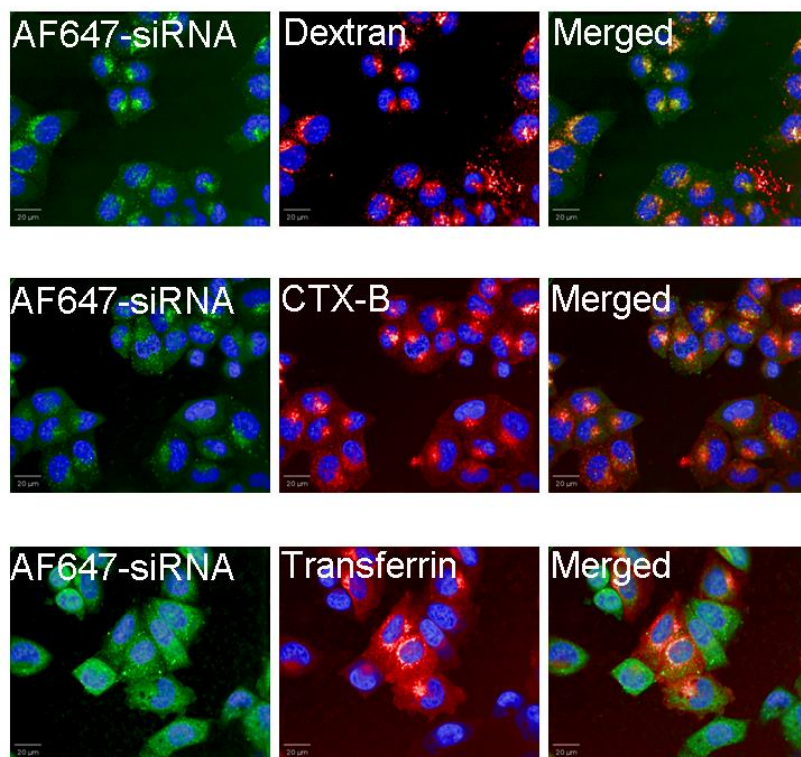

**Fig. S3. cKK-E12-siRNA LNPs cellular internalization.** Co-localization studies of labeled-siRNA BLNPs with labeled makers for different endocytic pathways including dextran, Cholera toxin B (CTX-B), or transferrin. The labeled BLNPs co-localized with dextran (co-localization percentage:  $17.7 \pm 0.2$ ) but significantly ( $P < 0.05$ ) less with transferrin (co-localization percentage:  $6.3 \pm 0.8$ ) or Cholera toxin B (co-localization percentage:  $10.2 \pm 0.3$ ).  $n = 30$  images. Scale bar:  $20 \mu\text{m}$ .

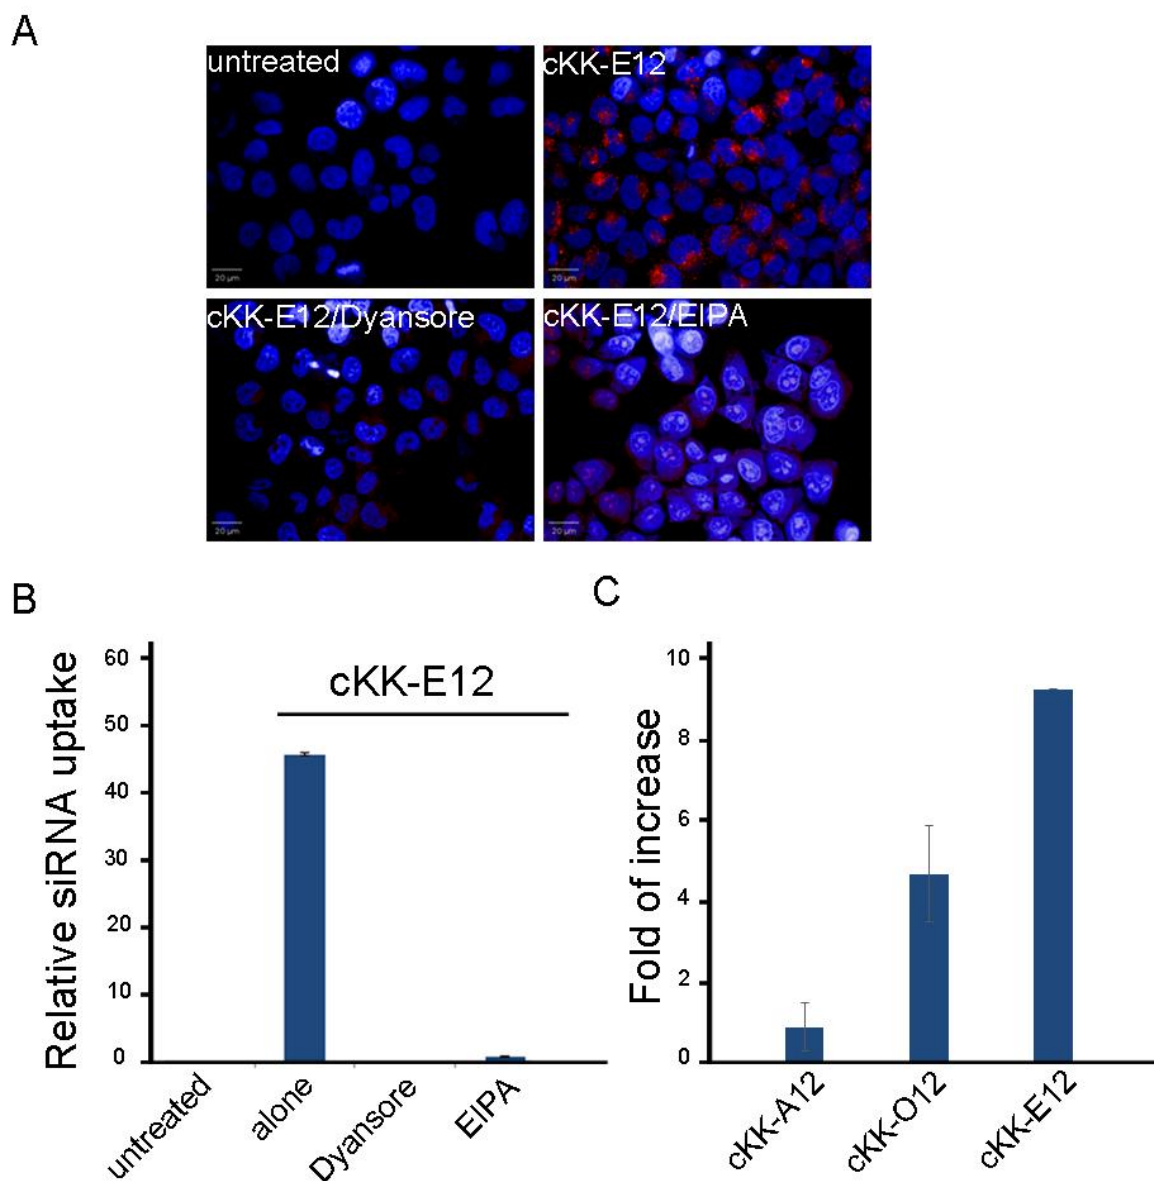

**Fig. S4. cKK-E12-siRNA LNPs cellular internalization through dyanmin-dependent macropinocytosis.** (A) Cell uptake studies of labeled-siRNA BLNPs in the presence of apoE with dynasore (dynamin inhibitor) and EIPA (macropinocytosis inhibitor). (B) Quantification of cell uptake. Scale bar: 20  $\mu$ m. (C) Impacts of apoE on the cellular uptake of cKK-A12, cKK-O12, and cKK-E12 LPNs.

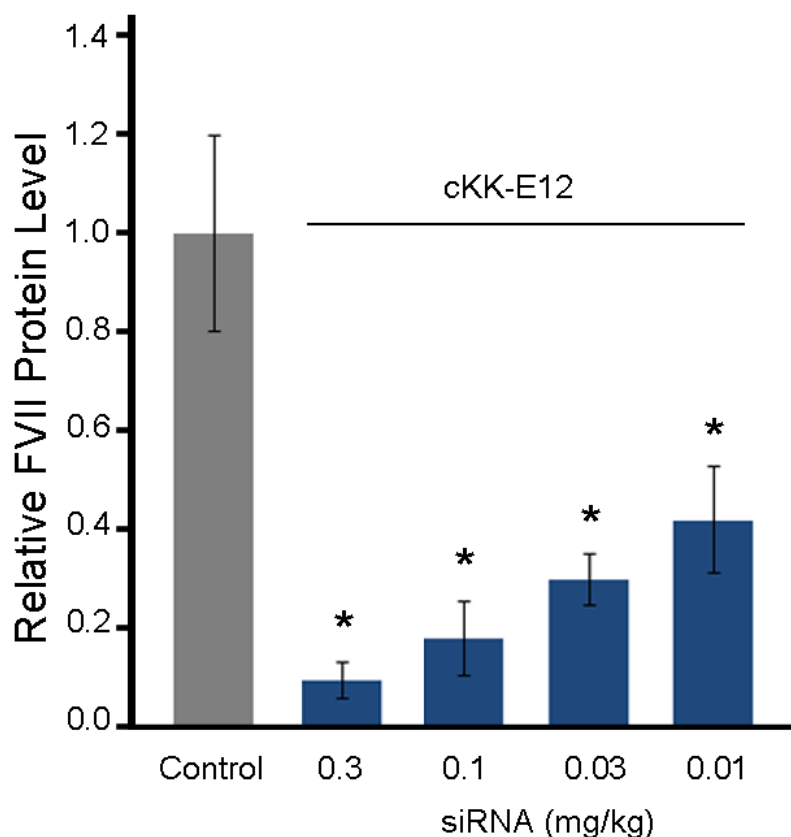

**Fig. S5. Silencing effects of cKK-E12 LPNs in rats.** Sprague-Dawley rats were administered FVII-formulated cKK-E12 via intravenous infusions. Data points represent group mean  $\pm$  s.d. (n= 3; \*, P < 0.05; t-test, double-tailed).

**Table S2. Clinical chemistry for cKK-E12–treated rats**

| siRNA<br>(mg/kg) | time | ALT<br>(U/L) | AST<br>(U/L) | TBILI<br>(mg/dL) | TBA<br>(umol/L) | CHOL<br>(mg/dL) | CREAT<br>(mg/dL) | BUN<br>(mg/dL) |
|------------------|------|--------------|--------------|------------------|-----------------|-----------------|------------------|----------------|
| Control          |      | 54 $\pm$ 12  | 99 $\pm$ 11  | 0.18 $\pm$ 0.03  | 56 $\pm$ 34     | 92 $\pm$ 15     | 0.32 $\pm$ 0.05  | 13 $\pm$ 2     |
| 0.3              | 24 h | 55 $\pm$ 7   | 114 $\pm$ 27 | 0.17 $\pm$ 0.02  | 40 $\pm$ 28     | 91 $\pm$ 10     | 0.34 $\pm$ 0.04  | 16 $\pm$ 1     |
| 1                |      | 59 $\pm$ 8   | 101 $\pm$ 12 | 0.16 $\pm$ 0.01  | 45 $\pm$ 25     | 84 $\pm$ 21     | 0.36 $\pm$ 0.04  | 16 $\pm$ 1     |
| Control          |      | 54 $\pm$ 9   | 95 $\pm$ 26  | 0.16 $\pm$ 0.01  | 55 $\pm$ 31     | 83 $\pm$ 17     | 0.37 $\pm$ 0.14  | 19 $\pm$ 5     |
| 0.3              | 72 h | 42 $\pm$ 5   | 85 $\pm$ 14  | 0.12 $\pm$ 0.02  | 44 $\pm$ 20     | 69 $\pm$ 9      | 0.29 $\pm$ 0.02  | 16 $\pm$ 1     |
| 1                |      | 43 $\pm$ 5   | 78 $\pm$ 13  | 0.13 $\pm$ 0.01  | 43 $\pm$ 13     | 60 $\pm$ 9      | 0.27 $\pm$ 0.02  | 16 $\pm$ 0.4   |

Sprague-Dawley rats (n = 5) received 15-min intravenous infusions of cKK-E12 LPNs at different dose levels (0.3 & 1 mg/kg). Blood samples were taken at 24 & 72 h after administration. Control, PBS; ALT, alanine aminotransferase; AST, aspartate aminotransferase; TBILI, total bilirubin; TBA, total bile acids; CHOL, cholesterol; CREAT, creatinine; BUN, blood urea nitrogen.

## References

1. Heyes, J., Palmer, L., Bremner, K. & MacLachlan, I. (2005) Cationic lipid saturation influences intracellular delivery of encapsulated nucleic acids. *J Control Release* 107, 276-287.
